# Supplementary material for: GigaSOM.jl: High-performance clustering and visualization of huge cytometry datasets
Source: PubMed Central journal article supplement (PMC7672468; doi:10.1093/gigascience/giaa127), 2020-11-18
Supplement: giaa127_reviewer_2_report_original_submission.pdf [file giaa127_reviewer_2_report_original_submission.pdf]

## Reviewer Report

**Title:** GigaSOM.jl: High-performance clustering and visualization of huge cytometry datasets

**Version:** Original Submission    **Date:** 9/8/2020

**Reviewer name:** Nima Agheepour

### Reviewer Comments to Author:

High-throughput single cell analysis has revolutionized our ability to profile the immune system. Data analysis for these large datasets, however, has been lagging. Self-organizing maps have been broadly used to analyze such datasets. Kratochvíl et al. report the development of a fast and scalable pipeline for analysis of such datasets. The results are validated against manual analysis.

One area of improvement is to better clarify the methodological developments presented here vs. those already adopted by the field. This has already been done to a good degree but could be made more explicit, particularly with regards to Batch Training of SOMs, Map Reduce, etc.

The software package is of high quality. Julia is an exciting and appropriate choice for this project, which will help promote this up and coming language within the single-cell community.

### Level of Interest

Please indicate how interesting you found the manuscript: Choose an item.

### Quality of Written English

Please indicate the quality of language in the manuscript: Choose an item.

### Declaration of Competing Interests

Please complete a declaration of competing interests, considering the following questions:

- Have you in the past five years received reimbursements, fees, funding, or salary from an organisation that may in any way gain or lose financially from the publication of this manuscript, either now or in the future?
- Do you hold any stocks or shares in an organisation that may in any way gain or lose financially from the publication of this manuscript, either now or in the future?
- Do you hold or are you currently applying for any patents relating to the content of the manuscript?
- Have you received reimbursements, fees, funding, or salary from an organization that holds or has applied for patents relating to the content of the manuscript?
- Do you have any other financial competing interests?
- Do you have any non-financial competing interests in relation to this paper?

If you can answer no to all of the above, write 'I declare that I have no competing interests' below. If your reply is yes to any, please give details below.

I declare that I have no competing interests

I agree to the open peer review policy of the journal. I understand that my name will be included on my report to the authors and, if the manuscript is accepted for publication, my named report including any attachments I upload will be posted on the website along with the authors' responses. I agree for my report to be made available under an Open Access Creative Commons CC-BY license (<http://creativecommons.org/licenses/by/4.0/>). I understand that any comments which I do not wish to be included in my named report can be included as confidential comments to the editors, which will not be published.

Choose an item.

To further support our reviewers, we have joined with Publons, where you can gain additional credit to further highlight your hard work (see: <https://publons.com/journal/530/gigascience>). On publication of this paper, your review will be automatically added to Publons, you can then choose whether or not to claim your Publons credit. I understand this statement.

Yes Choose an item.
